# Supplementary material for: Depression and low physical activity are related to sarcopenia in hemodialysis: a single-center study
Source: PeerJ. 2021 Jun 29;9:e11695. doi: 10.7717/peerj.11695 (PMC8253107; doi:10.7717/peerj.11695)
Supplement: Supplemental Information 1 — The demographic and information of the study. [file peerj-09-11695-s001.xls]

## Sheet: Sarcopenia_PeerJ
age	BMI	HF	HT	DM	DLP	gout	thyroid	Hemodialysis	sixmeterwalk	gripstrength	SMI	sarcopenia_2019	BeckdepressionII	depression	gender	PA
75	26.2222	0	0	0	0	0	0	20	0.733496	14.9	6.10978	1	24	2	1	420
72	21.4	0	1	1	0	0	0	18	0.4	16	5.98475	1	22	2	1	0
36	17.2	0	1	0	0	0	0	10	0.91	34	6.36594	1	17	1	1	1080
90	20.9375	0	0	0	0	1	1	10	0	13.9	4.92031	1	15	1	1	0
80	19.5502	0	1	0	0	0	0	13	0.537634	20.3	5.04394	1	14	1	1	0
74	27.4423	0	1	1	1	0	0	8	0.481928	13.3	5.65311	1	22	2	2	420
63	21.3648	0	0	0	0	0	0	5	0.728597	20.1	6.72991	1	15	1	1	0
52	18.2699	0	1	1	1	0	0	4	1.69972	24.7	6.21176	1	29	3	1	600
62	22.1094	1	1	1	1	0	0	3	0.414938	20.4	6.47805	1	22	2	1	1080
78	23.4222	1	1	1	0	0	0	2	0.827586	21.4	5.31684	1	16	1	2	0
68	19.3792	1	1	1	0	0	0	12	0	11	5.60059	1	13	0	1	0
89	18.5018	0	1	0	0	1	0	10	0.487607	8	3.73736	1	10	0	1	0
61	18.1333	1	0	1	0	0	0	19	0.694444	9.5	4.87787	1	9	0	1	0
72	22.2368	0	1	1	0	0	0	10	0.688468	14.3	4.42513	1	6	0	2	0
63	20.1746	0	0	0	0	0	0	12	1.47239	16.9	4.82172	1	6	0	2	240
85	25.6889	0	1	1	1	0	0	17	0.779221	11.4	4.95796	1	3	0	2	0
63	23.1641	0	0	0	0	0	0	15	0.909091	25.3	5.90684	1	1	0	1	1680
83	19.4797	0	1	0	0	0	0	8	0.513919	14.8	3.79854	1	12	0	2	200
59	18.9778	0	0	0	0	1	0	9	0.789474	16.7	4.27	1	8	0	2	1200
75	21.2604	1	1	1	0	0	0	8	0.334728	13.9	4.25208	1	7	0	2	0
56	18.5322	1	0	0	0	0	0	5	0.847458	16.9	5.17049	1	1	0	1	480
65	18.2667	0	0	1	0	0	1	2	0.547945	17.8	4.25613	1	10	0	2	1920
79	19.9991	0	1	1	0	0	0	3	0.818554	13.8	4.59979	1	10	0	2	0
66	22.5567	0	1	1	0	0	0	0.5	0.931677	23.4	6.27076	1	8	0	1	300
78	22.5778	1	1	1	0	0	0	2	0.326353	13.5	4.24462	1	8	0	1	0
72	21.1257	0	1	0	1	0	0	8	0.749064	17.4	3.78151	1	8	0	2	840
84	22.8532	0	1	1	0	0	0	3	0.449438	9.5	4.54778	1	7	0	2	1680
41	22.3	0	0	0	0	0	0	1	0.93	18	4.35319	1	6	0	2	1120
76	19.9665	1	1	1	0	1	0	1	0.852878	11.9	6.28944	1	6	0	1	320
81	20.1041	0	0	0	0	0	0	3	0.886263	18.3	3.9806	1	4	0	2	1120
52	24.0892	0	1	0	1	0	0	1.5	0.91673	29.3	6.9377	1	3	0	1	40
45	17.6	0	1	1	1	0	0	3	0.85	18	5.53142	1	3	0	2	1920
87	22.2222	0	0	0	0	0	0	4	0.986842	16.4	4.4	1	3	0	2	1120
52	20.6367	1	1	1	0	0	0	2	1.26716	21.9	6.41802	1	2	0	1	480
35	21.5	0	1	0	0	0	0	9	0.99	26	6.76132	0	25	2	1	0
71	29.2822	0	0	0	0	0	0	7	0.696864	31.9	8.25759	0	19	1	1	3540
61	16.7	0	0	0	0	0	0	5	1.52	32	5.50483	0	17	1	1	1920
45	17.8	0	1	0	0	0	0	5	1.17	22	4.80306	0	16	1	2	420
46	19.1	0	1	0	0	0	0	8	1.29	36	6.44545	0	15	1	1	1200
56	23.1	1	1	0	0	1	1	9	1.11	28	6.845	0	14	1	1	6000
37	23.7	0	1	0	1	0	0	1	1.09	22	4.9262	0	17	1	2	3720
46	21.4	0	1	1	1	0	0	2	0.88	18	6.60647	0	16	1	2	840
64	25.4667	0	1	1	1	0	0	15	1.00083	12.1	5.93373	0	13	0	2	360
40	20.7	0	1	0	0	0	0	1	1.46	24	5.29	0	5	0	2	2560
62	21.8361	0	0	0	0	0	0	15	1.67832	31.3	6.529	0	5	0	1	7320
52	22.2338	1	0	0	0	0	0	19	1.0582	29.5	6.40333	0	5	0	1	840
58	23.8287	0	1	0	0	0	0	13	1.27524	32.3	7.69668	0	3	0	1	1080
45	25.2	0	0	0	0	0	0	17	1.26	46	7.47125	0	3	0	1	1120
67	36.1141	0	1	1	0	1	0	12	0.644122	15.3	8.99241	0	2	0	1	240
45	23.4	0	0	0	0	0	0	10	0.91	30	5.8227	0	1	0	2	1920
52	23.3	0	0	0	0	0	0	15	0.96	22	5.02884	0	0	0	2	1080
80	24.2031	0	1	1	0	0	0	8	0.597312	21.5	6.68005	0	12	0	2	160
45	19.9	0	1	0	0	0	0	6	1.22	24	5.54005	0	11	0	2	0
57	23.0523	0	0	1	0	0	0	7	1.17878	23	5.57865	0	9	0	2	2560
36	18.8	0	1	0	0	0	0	5	1.55	32	5.18321	0	8	0	2	1920
61	24.9425	1	1	1	0	0	0	5	1.07817	29.9	6.11091	0	7	0	1	360
45	22.3126	0	1	0	1	0	0	8	1.49254	27.2	5.86822	0	5	0	2	1920
63	28.7755	1	1	0	0	0	0	9	1.02128	19.4	8.20101	0	5	0	1	3540
48	24.5975	0	1	1	0	0	0	8	1.20482	27.9	6.00179	0	4	0	2	960
56	31.0455	0	1	0	0	0	0	7	0.936768	23.2	9.62411	0	3	0	1	300
58	23.8	0	1	1	1	1	0	7	1.03	30	7.01417	0	3	0	1	6000
67	25.5347	1	1	1	0	1	0	7	0.892857	24.5	6.53688	0	3	0	2	0
56	19.4	0	1	0	0	0	0	6	1.31	28	6.80138	0	2	0	1	1200
62	29.1839	1	0	0	0	0	0	6	0.865801	34.2	8.11312	0	2	0	1	840
55	30	0	0	0	0	0	0	9	0.67	18	5.81138	0	2	0	2	0
69	24.4637	1	1	0	1	1	0	9	0.574163	26	7.26571	0	2	0	1	2520
63	22.3529	0	0	0	0	0	0	8	1.37931	28.9	6.30353	0	1	0	1	5280
45	33.5986	0	1	1	0	0	0	7	0.965406	32.8	8.76924	0	0	0	1	3540
58	24.4748	1	0	0	0	0	0	1	1.2109	25.3	8.19907	0	12	0	1	600
67	27.3995	1	0	0	0	0	0	2.5	1.03538	23.4	7.58965	0	11	0	1	0
68	21.7534	1	1	0	0	0	0	4	0.697269	15.4	5.72115	0	11	0	2	360
54	23.1111	0	1	0	1	0	0	3	1.222	17.9	5.616	0	10	0	2	0
73	28.0404	0	1	0	1	0	0	1	0.316372	9.5	5.88848	0	9	0	2	0
68	28.8286	0	1	1	1	0	0	2	0.852273	21.3	7.40894	0	9	0	1	0
78	25.7819	0	1	1	1	0	0	2	0.649702	20	7.24472	0	9	0	1	1
55	21.5234	0	0	0	0	0	0	0.92	0.996678	28.2	6.5216	0	8	0	1	120
45	21.7815	0	1	0	1	0	0	1	1.22324	42.2	8.25517	0	7	0	1	480
57	28.8672	0	1	1	0	0	0	1	0.956938	13.5	7.5632	0	7	0	1	3720
61	23.9853	0	1	0	1	0	0	2	0.683371	18.1	5.8764	0	7	0	2	12480
71	24.7751	0	1	1	0	0	0	2	1.18227	29.5	6.98657	0	7	0	1	840
44	24.8	0	0	0	0	0	0	1	0.95	34	7.73961	0	6	0	1	12480
59	35.3906	0	1	1	0	0	0	3	0.78637	16.5	7.39664	0	6	0	2	0
59	30.9	0	1	1	1	0	0	3	0.8	30	7.24038	0	6	0	1	1200
42	26.5	0	1	0	0	0	0	1	0.98	18	6.2088	0	5	0	2	12480
65	26.5234	0	1	0	1	0	0	1	1.12782	22.3	6.86957	0	5	0	2	720
46	21.5978	1	0	0	0	0	0	2	1.49254	34.8	6.43614	0	5	0	1	360
54	25.8121	0	1	0	0	0	0	4	1.60643	34.5	7.30482	0	5	0	1	2400
42	22.8	0	1	0	0	1	0	3	0.95	42	7.03786	0	4	0	1	1120
43	25	0	1	0	0	0	0	2	1.09	18	7.84965	0	3	0	2	6000
49	20.6	0	0	0	0	0	0	2	0.97	20	4.52711	0	3	0	2	2560
48	19.2	0	1	0	0	0	0	4	0.96	14	5.89991	0	3	0	2	12480
56	24.4922	0	1	1	1	0	0	1.5	1.47059	17.8	6.02508	0	2	0	2	960
67	28.5529	1	1	1	1	0	0	3	0.765306	21.5	6.16743	0	2	0	2	980
37	27.2	0	1	0	0	0	0	1	1.36	32	6.60496	0	1	0	2	1080
40	30.3911	0	0	0	0	0	0	1	1.37615	50	9.66437	0	1	0	2	840
42	23.8	0	1	0	0	0	0	1	0.98	28	7.84503	0	1	0	1	1080
64	35.9264	1	1	1	0	0	0	1	0.377953	20.7	7.83194	0	1	0	2	6000
65	20.8122	0	1	0	0	0	0	1	1.28068	27.4	5.55686	0	1	0	2	6720
36	17.1	0	1	0	0	0	0	3	1.39	34	6.2391	0	1	0	1	2560
67	27.5298	0	1	0	0	0	0	1	1.30577	38.3	7.87351	0	0	0	1	3780
61	19.7	0	1	1	0	1	0	2	1.14	26	5.80417	0	0	0	1	1920
78	25.3146	1	1	0	1	0	0	2	1.00334	34.8	6.48055	0	0	0	2	560
50	23.3984	0	1	0	0	0	0	3	1.48883	22.6	6.66855	0	0	0	2	13680
62	20.3906	0	1	0	0	0	0	3	1.1236	25.8	5.17922	0	0	0	2	1680
